# Supplementary material for: Development of a Multidimensional Pain Questionnaire in Professional Dance (MPQDA): a pilot study
Source: Springer Nature journal article supplement (doi:10.1186/s13102-022-00580-5), 2022-11-03
Supplement: MOESM1 [file 13102_2022_580_MOESM1_ESM.pdf]

## Additional file 1:

### Descriptive statistics of pain dimensions comparing the language versions

#### Content

|   |                                              |   |
|---|----------------------------------------------|---|
| 1 | Localizations (Tables A1-A3).....            | 1 |
| 2 | Subjective sensation of pain (Table A4)..... | 2 |
| 3 | Temporal course of pain (Table A5).....      | 3 |
| 4 | Pain behavior (Table A6).....                | 4 |

#### 1 Localizations (Tables A1-A3)

**Table A1.** Pain localizations in the last 3 months of the dancers in the total sample (n = 72) and in the language versions (n = 36 each)

|                                            | <b>Total<br/>(n = 72)<br/>n (%)</b> |              | <b>English<br/>(n =36)<br/>n (%)</b> |              | <b>German<br/>(n = 36)<br/>n (%)</b> |              | <b>p-value</b>     |                   |
|--------------------------------------------|-------------------------------------|--------------|--------------------------------------|--------------|--------------------------------------|--------------|--------------------|-------------------|
| <b>Head and torso</b>                      |                                     |              |                                      |              |                                      |              |                    |                   |
| Head                                       | 7 (9.7)                             |              | 1 (2.8)                              |              | 6 (16.7)                             |              | 0.12 <sup>b</sup>  |                   |
| Neck /cervical spine                       | 39 (54.2)                           |              | 20 (55.6)                            |              | 19 (52.8)                            |              | 0.81 <sup>a</sup>  |                   |
| Upper back/ thoracic spine                 | 24 (33.3)                           |              | 14 (38.9)                            |              | 10 (27.8)                            |              | 0.32 <sup>a</sup>  |                   |
| Lower back/ lumbar spine/ iliosacral joint | 47 (65.3)                           |              | 24 (66.7)                            |              | 23 (63.9)                            |              | 0.80 <sup>a</sup>  |                   |
| Stomach                                    | 5 (6.94)                            |              | 2 (5.6)                              |              | 3 (8.3)                              |              | 1.00 <sup>b</sup>  |                   |
| <b>Upper extremity</b>                     | <b>right</b>                        | <b>left</b>  | <b>right</b>                         | <b>left</b>  | <b>right</b>                         | <b>left</b>  | <b>right</b>       | <b>left</b>       |
| Shoulder/ upper arm                        | 13<br>(18.1)                        | 13<br>(18.1) | 8<br>(22.2)                          | 8<br>(22.2)  | 5<br>(13.9)                          | 5<br>(13.9)  | 0.36 <sup>a</sup>  | 0.36 <sup>a</sup> |
| Elbow/ forearm                             | 7<br>(9.7)                          | 5<br>(6.9)   | 5<br>(13.9)                          | 2<br>(5.6)   | 2<br>(5.6)                           | 3<br>(8.3)   | 0.43 <sup>b</sup>  | 1.00 <sup>b</sup> |
| Wrist/ hand                                | 13<br>(18.1)                        | 14<br>(19.4) | 7<br>(19.4)                          | 7<br>(19.4)  | 6<br>(16.7)                          | 7<br>(19.4)  | 0.76 <sup>a</sup>  | 1.00 <sup>a</sup> |
| <b>Lower extremity</b>                     | <b>right</b>                        | <b>left</b>  | <b>right</b>                         | <b>left</b>  | <b>right</b>                         | <b>left</b>  | <b>right</b>       | <b>left</b>       |
| Hip joint                                  | 17<br>(23.6)                        | 26<br>(36.1) | 10<br>(27.8)                         | 15<br>(41.7) | 7<br>(19.4)                          | 11<br>(30.6) | 0.41 <sup>a</sup>  | 0.33 <sup>a</sup> |
| Upper thigh                                | 9<br>(12.5)                         | 8<br>(11.1)  | 7<br>(19.4)                          | 6<br>(16.7)  | 2 (5.6)                              | 2<br>(5.6)   | 0.15 <sup>b</sup>  | 0.26 <sup>b</sup> |
| Knee                                       | 26<br>(36.1)                        | 28<br>(38.9) | 13<br>(36.1)                         | 14<br>(38.9) | 13<br>(36.1)                         | 14<br>(38.9) | 1.00 <sup>a</sup>  | 1.00 <sup>a</sup> |
| Lower leg                                  | 6<br>(8.3)                          | 12<br>(16.7) | 5<br>(13.9)                          | 8<br>(22.2)  | 1<br>(2.8)                           | 4<br>(11.1)  | 0.199 <sup>b</sup> | 0.21 <sup>a</sup> |
| Ankle joint                                | 16<br>(22.2)                        | 22<br>(30.6) | 9<br>(25.0)                          | 12<br>(33.3) | 7<br>(19.4)                          | 10<br>(27.8) | 0.57 <sup>a</sup>  | 0.61 <sup>a</sup> |
| Rear-/midfoot                              | 9<br>(12.5)                         | 8<br>(11.1)  | 4<br>(11.1)                          | 3<br>(8.3)   | 5<br>(13.9)                          | 5<br>(13.9)  | 1.00 <sup>b</sup>  | 0.71 <sup>b</sup> |
| Forefoot (right*)                          | 15<br>(20.8)                        | 17<br>(23.6) | 4<br>(11.1)                          | 6<br>(16.7)  | 11<br>(30.6)                         | 11<br>(30.6) | 0.04 <sup>a</sup>  | 0.17 <sup>a</sup> |

<sup>a</sup>Chi<sup>2</sup>-test, <sup>b</sup>Fisher's exact test, \*p<0.05

**Table A2.** Most severely affected pain region of the dancers in the total sample (n = 72) and in the language versions (n = 36 each) according to superior categories of pain regions

|                 | <b>Total<br/>(n = 72)</b><br>n (%) | <b>English<br/>(n = 36)</b><br>n (%) | <b>German<br/>(n = 36)</b><br>n (%) | <b>p-value</b>    |
|-----------------|------------------------------------|--------------------------------------|-------------------------------------|-------------------|
| Head and torso  | 30 (41.7)                          | 13 (36.1)                            | 17 (47.2)                           | 0.64 <sup>b</sup> |
| Upper extremity | 6 (8.3)                            | 3 (8.3)                              | 3 (8.3)                             |                   |
| Lower extremity | 36 (50.0)                          | 20 (55.6)                            | 16 (44.4)                           |                   |

<sup>b</sup>Fisher's exact test

**Table A3.** Accompanying symptoms of the most severely affected pain region (not = 0, somewhat = 1, fairly = 2, very = 3) of the dancers in the total sample (n = 72) and in the language versions (n = 36 each)

|                        | <b>Total<br/>(n = 72)</b><br>$\tilde{x}$ (IQR) | <b>English<br/>(n = 36)</b><br>$\tilde{x}$ (IQR) | <b>German<br/>(n = 36)</b><br>$\tilde{x}$ (IQR) | <b>p-value</b>    |
|------------------------|------------------------------------------------|--------------------------------------------------|-------------------------------------------------|-------------------|
| Tight/hard/tense       | 2.0 (2.0)                                      | 2.0 (2.0)                                        | 2.0 (2.0)                                       | 0.92 <sup>c</sup> |
| Restricted in mobility | 2.0 (1.0)                                      | 2.0 (1.0)                                        | 2.0 (1.0)                                       | 0.61 <sup>c</sup> |
| Less resilient*        | 2.0 (1.0)                                      | 1.0 (1.5)                                        | 2.0 (0)                                         | 0.00 <sup>c</sup> |

<sup>c</sup>Mann-Whitney-U-test; \*p<0.05

## 2 Subjective sensation of pain (Table A4)

**Table A4.** Sensory and affective pain quality (does not apply = 0, applies a little = 1, applies mostly = 2, applies exactly = 3) of the dancers in the total sample (n = 72) and in the language versions (n = 36 each)

|                             | <b>Total<br/>(n = 72)</b><br>$\tilde{x}$ (IQR)<br>Missing [n (%)] | <b>English<br/>(n = 36)</b><br>$\tilde{x}$ (IQR)<br>Missing [n (%)] | <b>German<br/>(n = 36)</b><br>$\tilde{x}$ (IQR)<br>Missing [n (%)] | <b>p-value</b>     |
|-----------------------------|-------------------------------------------------------------------|---------------------------------------------------------------------|--------------------------------------------------------------------|--------------------|
| <b>Sensory pain quality</b> |                                                                   |                                                                     |                                                                    |                    |
| Dull                        | 0 (1.0)<br>[4 (5.6)]                                              | 0 (1.0)<br>[2 (5.6)]                                                | 0.5 (1.0)<br>[2 (5.6)]                                             | 0.38 <sup>c</sup>  |
| Pressing                    | 1.0 (2.0)<br>[5 (6.9)]                                            | 1.0 (1.0)<br>[3 (8.3)]                                              | 1.0 (2.0)<br>[2 (5.6)]                                             | 0.55 <sup>c</sup>  |
| Cramping                    | 0.5 (1.0)<br>[4 (5.6)]                                            | 0 (1.0)<br>[3 (8.3)]                                                | 1.0 (2.0)<br>[1 (2.8)]                                             | 0.28 <sup>c</sup>  |
| Pulling                     | 1.0 (2.0)<br>[2 (2.8)]                                            | 1.0 (2.0)<br>[2 (5.6)]                                              | 2.0 (1.5)<br>-                                                     | 0.69 <sup>c</sup>  |
| Tearing                     | 0 (2.0)<br>[4 (5.6)]                                              | 1.0 (2.0)<br>[3 (8.3)]                                              | 0 (2.0)<br>[1 (2.8)]                                               | 0.48 <sup>c</sup>  |
| Shooting*                   | 0 (1.0)<br>[4 (5.6)]                                              | 0 (0)<br>[3 (8.3)]                                                  | 1.0 (3.0)<br>[1 (2.8)]                                             | 0.002 <sup>c</sup> |
| Stabbing                    | 0 (2.0)<br>[6 (8.3)]                                              | 0 (2.0)<br>[4 (11.1)]                                               | 1.0 (2.0)<br>[2 (5.6)]                                             | 0.34 <sup>c</sup>  |
| Sharp                       | 0 (2.0)<br>[2 (2.8)]                                              | 1.0 (2.0)<br>[1 (2.8)]                                              | 0 (2.0)<br>[1 (2.8)]                                               | 0.93 <sup>c</sup>  |

| <b>Affective pain quality</b> |                        |                        |                        |                    |
|-------------------------------|------------------------|------------------------|------------------------|--------------------|
| Tiring/exhausting             | 1.0 (2.0)<br>[2 (2.8)] | 1.0 (2.0)<br>[2 (5.6)] | 1.0 (2.0)<br>-         | 0.67 <sup>c</sup>  |
| Fearful*                      | 0 (1.0)<br>[4 (5.6)]   | 0 (1.0)<br>[2 (5.6)]   | 0.5 (2.0)<br>[2 (5.6)] | 0.046 <sup>c</sup> |
| Wretched                      | 0 (1.0)<br>[6 (8.3)]   | 0 (0)<br>[3 (8.3)]     | 0 (1.0)<br>[3 (8.3)]   | 0.12 <sup>c</sup>  |
| Terrible                      | 0 (1.0)<br>[5 (6.9)]   | 0 (1.0)<br>[3 (8.3)]   | 0 (1.0)<br>[2 (5.6)]   | 0.67 <sup>c</sup>  |
| Paralyzing                    | 0 (1.0)<br>[5 (6.9)]   | 0 (1.0)<br>[3 (8.3)]   | 0 (1.0)<br>[2 (5.6)]   | 0.49 <sup>c</sup>  |
| Unbearable                    | 0 (1.0)<br>[4 (5.6)]   | 0 (1.0)<br>[2 (5.6)]   | 0 (1.0)<br>[2 (5.6)]   | 0.99 <sup>c</sup>  |

$\tilde{x}$  = median, IQR = interquartile range, <sup>c</sup>Mann-Whitney-U-test; \*p<0.05

### 3 Temporal course of pain (Table A5)

**Table A5.** Pain duration, pain frequency (only once = 0, rarely = 1, frequently = 2, permanently = 3), type of pain occurrence, pain occurrence under mechanical stimuli (rarely = 1, frequently = 2, permanently = 3) of the dancers in the total sample (n = 72) and in the language versions (n = 36 each)

|                                                               | <b>Total<br/>(n = 72)</b> | <b>English<br/>(n = 36)</b> | <b>German<br/>(n = 36)</b> | <b>p-value</b>    |
|---------------------------------------------------------------|---------------------------|-----------------------------|----------------------------|-------------------|
| <b>Pain duration</b><br>n (%)                                 |                           |                             |                            |                   |
| Maximum of one week                                           | 9 (12.5)                  | 6 (16.7)                    | 3 (8.3)                    | 0.86 <sup>b</sup> |
| Between one and 6 weeks                                       | 11 (15.3)                 | 6 (16.7)                    | 5 (13.9)                   |                   |
| Between 6 and 12 weeks                                        | 8 (11.1)                  | 4 (11.1)                    | 4 (11.1)                   |                   |
| Between 3 and 6 months                                        | 13 (18.1)                 | 7 (19.4)                    | 6 (17.7)                   |                   |
| Longer than 6 months                                          | 29 (40.3)                 | 13 (36.1)                   | 16 (44.4)                  |                   |
| Missing [n (%)]                                               | [2 (2.8)]                 | -                           | [2 (5.6)]                  |                   |
| <b>Pain frequency</b><br>$\tilde{x}$ (IQR)<br>Missing [n (%)] | 2.0 (0)<br>[2 (2.8)]      | 2.0 (1.0)<br>-              | 2.0 (0)<br>[2 (5.6)]       | 0.27 <sup>c</sup> |
| <b>Type of pain occurrence</b><br>n (%)                       |                           |                             |                            |                   |
| Suddenly/ a single event                                      | 9 (12.5)                  | 6 (16.7)                    | 3 (8.3)                    | 0.48 <sup>b</sup> |
| Over time/ creeping                                           | 41 (56.9)                 | 19 (52.8)                   | 22 (61.1)                  |                   |
| Within 24 hours after work                                    | 12 (16.7)                 | 7 (19.4)                    | 5 (13.9)                   |                   |
| In another way                                                | 9 (12.5)                  | 3 (8.3)                     | 6 (16.7)                   |                   |
| Missing [n (%)]                                               | [1 (1.4)]                 | [1 (2.8)]                   | -                          |                   |

| <b>Pain occurrence under mechanical stimuli</b><br>$\tilde{x}$ (IQR), Missing [n (%)] |                        |                        |                        |                   |
|---------------------------------------------------------------------------------------|------------------------|------------------------|------------------------|-------------------|
| When weight-bearing*                                                                  | 2.0 (0)<br>[4 (5.6)]   | 2.0 (1.0)<br>[2 (5.6)] | 2.0 (1.0)<br>[2 (5.6)] | 0.01 <sup>c</sup> |
| During movement                                                                       | 2.0 (1.0)<br>[5 (6.9)] | 2.0 (1.0)<br>[1 (2.8)] | 2.0 (0)<br>[4 (11.1)]  | 0.46 <sup>c</sup> |
| At rest                                                                               | 1.0 (1.0)<br>[3 (4.2)] | 1.0 (1.0)<br>[3 (8.3)] | 1.0 (1.0)<br>-         | 0.72 <sup>c</sup> |

$\tilde{x}$  = median, IQR = interquartile range; <sup>b</sup>Fisher's exact test, <sup>c</sup>Mann-Whitney-U-test; \*p<0.05

#### 4 Pain behavior (Table A6)

**Table A6.** Psychosocial motives of working with pain (does not apply = 0, applies a little = 1, applies mostly = 2, applies exactly = 3) of the dancers in the total sample (n = 71) and in the language versions (English: n = 35, German: n = 36)

|                                                                  | <b>Total</b><br><b>(n = 71)</b><br>$\tilde{x}$ (IQR)<br>Missing<br>[n (%)] | <b>English</b><br><b>(n = 35)</b><br>$\tilde{x}$ (IQR)<br>Missing<br>[n (%)] | <b>German</b><br><b>(n = 36)</b><br>$\tilde{x}$ (IQR)<br>Missing<br>[n (%)] | <b>p-value</b>      |
|------------------------------------------------------------------|----------------------------------------------------------------------------|------------------------------------------------------------------------------|-----------------------------------------------------------------------------|---------------------|
| The pain's not so bad, so there's no need for a break.*          | 1.0 (1.0)<br>[2 (2.8)]                                                     | 2.0 (1.0)<br>[1 (2.9)]                                                       | 1.0 (2.0)<br>[1 (2.9)]                                                      | 0.04 <sup>c</sup>   |
| The pain is a natural consequence of dancing.                    | 1.0 (1.0)<br>[1 (1.4)]                                                     | 1.0 (1.0)<br>-                                                               | 1.0 (2.0)<br>[1 (2.8)]                                                      | 0.78 <sup>c</sup>   |
| I don't want to let my company down.                             | 2.0 (2.0)<br>[2 (2.8)]                                                     | 2.0 (2.0)<br>-                                                               | 1.0 (3.0)<br>[2 (5.6)]                                                      | 0.97 <sup>c</sup>   |
| I feel existential/ financial pressure.*                         | 1.0 (2.0)<br>[2 (2.8)]                                                     | 0 (1.0)<br>[1 (2.9)]                                                         | 2.0 (3.0)<br>[1 (2.8)]                                                      | 0.0001 <sup>c</sup> |
| I feel pressure from superiors (training leader, choreographer). | 0 (2.0)<br>[2 (2.8)]                                                       | 1.0 (1.0)<br>-                                                               | 0 (2.0)<br>[2 (5.6)]                                                        | 0.51 <sup>c</sup>   |
| I feel pressure from colleagues.                                 | 0 (1.0)<br>[3 (4.2)]                                                       | 0 (1.0)<br>[1 (2.9)]                                                         | 0 (1.0)<br>[2 (5.6)]                                                        | 0.55 <sup>c</sup>   |
| I don't want to be considered unreliable.                        | 1 (3.0)<br>[2 (2.8)]                                                       | 2.0 (2.0)<br>-                                                               | 1.0 (3.0)<br>[2 (5.6)]                                                      | 0.61 <sup>c</sup>   |
| I don't want to lose my role.                                    | 1.0 (2.0)<br>[3 (4.2)]                                                     | 1.0 (2.0)<br>[1 (2.9)]                                                       | 1.5 (3.0)<br>[2 (5.6)]                                                      | 0.49 <sup>c</sup>   |
| I don't want to lose my status.*                                 | 1.0 (2.0)<br>[2 (2.8)]                                                     | 0 (2.0)<br>[1 (2.9)]                                                         | 2.0 (3.0)<br>[1 (2.8)]                                                      | 0.02 <sup>c</sup>   |
| I have concerns my dancing skills are going down.*               | 1.0 (2.0)<br>[2 (2.8)]                                                     | 0 (2.0)<br>[1 (2.9)]                                                         | 1.0 (2.0)<br>[1 (2.8)]                                                      | 0.02 <sup>c</sup>   |
| I have concerns my body is getting out of its aesthetic form.    | 1.0 (2.0)<br>[2 (2.8)]                                                     | 0 (1.0)<br>[1 (2.9)]                                                         | 1.0 (2.0)<br>[1 (2.8)]                                                      | 0.19 <sup>c</sup>   |
| I want to impress the audience.                                  | 0 (1.0)<br>[3 (4.2)]                                                       | 0 (1.0)<br>[1 (2.9)]                                                         | 0 (1.0)<br>[2 (5.6)]                                                        | 0.31 <sup>c</sup>   |

|                                                      |                        |                      |                        |                   |
|------------------------------------------------------|------------------------|----------------------|------------------------|-------------------|
| Dancing is more important to me than my health.      | 0 (1.0)<br>[3 (4.2)]   | 0 (1.0)<br>[1 (2.9)] | 1.0 (1.0)<br>[2 (5.6)] | 0.11 <sup>c</sup> |
| Dancing is my passion – I just have to keep dancing. | 1.0 (2.5)<br>[3 (4.2)] | 1 (2.0)<br>[1 (2.9)] | 2.0 (2.0)<br>[2 (5.6)] | 0.16 <sup>c</sup> |

$\tilde{x}$  = median, IQR = interquartile range, <sup>c</sup>Mann-Whitney-U-test; \*p<0.05
