# Supplementary material for: Development of a Multidimensional Pain Questionnaire in Professional Dance (MPQDA): a pilot study
Source: Springer Nature journal article supplement (doi:10.1186/s13102-022-00580-5), 2022-11-03
Supplement: MOESM2 [file 13102_2022_580_MOESM2_ESM.pdf]

## Additional file 2: Inter-item correlations of scales with numerous items

- Calculations
  - tetrachoric correlation for the dichotomous variables ( $r_{tet}$ )
  - polychoric correlation for the four-point ordinal scales ( $r_{pol}$ )
- Critical values:
  - no correlation:  $r_{pol}$  OR  $r_{tet} < 0.2$
  - very high correlation:  $r_{pol}$  OR  $r_{tet} > 0.9$

### Content

|      |                                         |   |
|------|-----------------------------------------|---|
| 1    | Localizations.....                      | 3 |
| 1.1  | Total sample (n = 72) .....             | 3 |
| 1.2. | English version (n = 36) .....          | 4 |
| 1.3  | German version (n = 36) .....           | 5 |
| 2    | Accompanying symptoms .....             | 6 |
| 2.1  | Total sample (n = 72) .....             | 6 |
| 2.2  | English version (n = 36) .....          | 6 |
| 2.3  | German version (n = 36) .....           | 7 |
| 3    | Sensory and affective pain quality..... | 7 |
| 3.1  | Total sample (n = 72) .....             | 7 |
| 1.2  | English version (n = 36) .....          | 8 |
| 1.3  | German version (n = 36) .....           | 9 |

|     |                                                 |    |
|-----|-------------------------------------------------|----|
| 4   | Pain occurrence under mechanical stimuli .....  | 9  |
| 1.1 | Total sample (n = 72) .....                     | 9  |
| 1.2 | English version (n = 36) .....                  | 10 |
| 1.3 | German version (n = 36) .....                   | 10 |
| 5   | Psychosocial motives for working with pain..... | 10 |
| 1.1 | Total sample (n = 72) .....                     | 11 |
| 1.2 | English version (n = 36) .....                  | 11 |
| 1.3 | German version (n = 36) .....                   | 12 |

# 1 Localizations

Tetrachoric correlation was performed for the following dimensions:

- **Head and torso:** head (PL04\_01), neck /cervical spine (PL04\_02), upper back/ thoracic spine (PL04\_03), lower back/ lumbar spine/ iliosacral joint (PL04\_05), stomach (PL04\_06)
- **Upper extremity:** shoulder/ upper arm (right: PL05z\_01; left: PL06z\_01), elbow/ forearm (right: PL05z\_02; left: PL06z\_02), wrist/ hand (right: PL05z\_03; left: PL06z\_03)
- **Lower extremity:** hip joint (right: PL07\_01; left: PL08\_01), upper thigh (right: PL07\_02; left: PL08\_02), knee (right: PL07\_03; left: PL08\_03), lower leg (right: PL07\_04; left: PL08\_04), ankle joint (right: PL07\_05; left: PL08\_05), rear-/midfoot (right: PL07\_06; left: PL08\_06), forefoot (right: PL07z\_07; left: PL08z\_07)

## 1.1 Total sample (n = 72)

### Head and torso:

|         | PL04_01 | PL04_02 | PL04_03 | PL04_05 | PL04_06 |
|---------|---------|---------|---------|---------|---------|
| PL04_01 | 1.0000  |         |         |         |         |
| PL04_02 | 1.0000  | 1.0000  |         |         |         |
| PL04_03 | 0.3407  | 0.2875  | 1.0000  |         |         |
| PL04_05 | 1.0000  | 0.4157  | 0.0346  | 1.0000  |         |
| PL04_06 | 0.2490  | 1.0000  | 0.5915  | 0.2241  | 1.0000  |

### Upper extremity:

|          | PL05z_01 | PL05z_02 | PL05z_03 | PL06z_01 | PL06z_02 | PL06z_03 |
|----------|----------|----------|----------|----------|----------|----------|
| PL05z_01 | 1.0000   |          |          |          |          |          |
| PL05z_02 | 0.4234   | 1.0000   |          |          |          |          |
| PL05z_03 | 0.1246   | 0.4234   | 1.0000   |          |          |          |
| PL06z_01 | 0.4434   | 0.7523   | 0.2945   | 1.0000   |          |          |
| PL06z_02 | 0.0375   | 0.7731   | 0.5878   | 0.7798   | 1.0000   |          |
| PL06z_03 | 0.0876   | 0.1712   | 0.5363   | 0.5363   | 0.5626   | 1.0000   |

**Lower extremity:**

|          | PL07_01 | PL07_02 | PL07_03 | PL07_04 | PL07_05 | PL07_06 | PL07z_07 | PL08_01 | PL08_02 | PL08_03 | PL08_04 | PL08_05 | PL08_06 | PL08z_07 |
|----------|---------|---------|---------|---------|---------|---------|----------|---------|---------|---------|---------|---------|---------|----------|
| PL07_01  | 1.0000  |         |         |         |         |         |          |         |         |         |         |         |         |          |
| PL07_02  | 0.6509  | 1.0000  |         |         |         |         |          |         |         |         |         |         |         |          |
| PL07_03  | 0.4322  | 0.2979  | 1.0000  |         |         |         |          |         |         |         |         |         |         |          |
| PL07_04  | 0.1592  | 0.4088  | -0.3108 | 1.0000  |         |         |          |         |         |         |         |         |         |          |
| PL07_05  | 0.0333  | -0.2565 | 0.1489  | -0.1076 | 1.0000  |         |          |         |         |         |         |         |         |          |
| PL07_06  | -0.0277 | -1.0000 | 0.1317  | -1.0000 | 0.3855  | 1.0000  |          |         |         |         |         |         |         |          |
| PL07z_07 | 0.3477  | 0.2379  | 0.5361  | -1.0000 | 0.2505  | 0.2379  | 1.0000   |         |         |         |         |         |         |          |
| PL08_01  | 0.5311  | 0.2979  | 0.4321  | -0.0407 | -0.0981 | -0.0455 | 0.1985   | 1.0000  |         |         |         |         |         |          |
| PL08_02  | 0.4226  | 0.8096  | 0.2086  | 0.4511  | -0.2134 | 0.0000  | 0.2967   | 0.3843  | 1.0000  |         |         |         |         |          |
| PL08_03  | -0.1928 | -0.2781 | 0.5298  | 0.1534  | 0.2108  | 0.2541  | 0.0210   | -0.1079 | -0.4499 | 1.0000  |         |         |         |          |
| PL08_04  | 0.0298  | 0.3389  | -0.0499 | 0.8512  | 0.2290  | -0.1472 | 0.2627   | 0.0973  | 0.5700  | 0.1883  | 1.0000  |         |         |          |
| PL08_05  | 0.1016  | 0.0475  | 0.0059  | 0.2766  | 0.4877  | 0.2258  | -0.2294  | 0.2122  | 0.2986  | -0.2673 | 0.3398  | 1.0000  |         |          |
| PL08_06  | -0.2372 | -1.0000 | 0.2086  | -1.0000 | 0.4497  | 0.6797  | 0.2967   | -0.1817 | 0.0417  | -0.0213 | 0.3936  | 0.6252  | 1.0000  |          |
| PL08z_07 | -0.0020 | 0.1784  | -0.1394 | -1.0000 | -0.2929 | -0.0277 | 0.2151   | -0.2655 | 0.0261  | -0.3154 | -0.1592 | 0.1016  | 0.4226  | 1.0000   |

**1.2. English version (n = 36)**

**Head and torso:**

|         | PL04_01 | PL04_02 | PL04_03 | PL04_05 | PL04_06 |
|---------|---------|---------|---------|---------|---------|
| PL04_01 | 1.0000  |         |         |         |         |
| PL04_02 | 1.0000  | 1.0000  |         |         |         |
| PL04_03 | 1.0000  | 0.0408  | 1.0000  |         |         |
| PL04_05 | 1.0000  | 0.4899  | -0.0661 | 1.0000  |         |
| PL04_06 | -1.0000 | 1.0000  | 0.1398  | 1.0000  | 1.0000  |

**Upper extremity:**

|          | PL05z_01 | PL05z_02 | PL05z_03 | PL06z_01 | PL06z_02 | PL06z_03 |
|----------|----------|----------|----------|----------|----------|----------|
| PL05z_01 | 1.0000   |          |          |          |          |          |
| PL05z_02 | 0.3284   | 1.0000   |          |          |          |          |
| PL05z_03 | -0.2018  | 0.3927   | 1.0000   |          |          |          |
| PL06z_01 | 0.3447   | 0.6153   | 0.1437   | 1.0000   |          |          |
| PL06z_02 | -1.0000  | 0.5391   | 1.0000   | 1.0000   | 1.0000   |          |
| PL06z_03 | -0.2018  | 0.0126   | 0.7152   | 0.4237   | 0.4275   | 1.0000   |

**Lower extremity:**

|          | PL07_01 | PL07_02 | PL07_03 | PL07_04 | PL07_05 | PL07_06 | PL07z_07 | PL08_01 | PL08_02 | PL08_03 | PL08_04 | PL08_05 | PL08_06 | PL08z_07 |
|----------|---------|---------|---------|---------|---------|---------|----------|---------|---------|---------|---------|---------|---------|----------|
| PL07_01  | 1.0000  |         |         |         |         |         |          |         |         |         |         |         |         |          |
| PL07_02  | 0.7270  | 1.0000  |         |         |         |         |          |         |         |         |         |         |         |          |
| PL07_03  | 0.2951  | 0.5935  | 1.0000  |         |         |         |          |         |         |         |         |         |         |          |
| PL07_04  | 0.2140  | 0.3927  | -0.2871 | 1.0000  |         |         |          |         |         |         |         |         |         |          |
| PL07_05  | -0.1338 | -0.2577 | 0.1711  | -1.0000 | 1.0000  |         |          |         |         |         |         |         |         |          |
| PL07_06  | -1.0000 | -1.0000 | -0.1817 | -1.0000 | 0.3964  | 1.0000  |          |         |         |         |         |         |         |          |
| PL07z_07 | 0.6631  | 0.7854  | 0.5518  | -1.0000 | 0.0000  | -1.0000 | 1.0000   |         |         |         |         |         |         |          |
| PL08_01  | 0.7207  | 0.5072  | 0.4661  | -0.0269 | -0.1697 | 0.1235  | 0.4801   | 1.0000  |         |         |         |         |         |          |
| PL08_02  | 0.6334  | 0.9267  | 0.2373  | 0.4639  | -1.0000 | -1.0000 | 0.1770   | 0.4086  | 1.0000  |         |         |         |         |          |
| PL08_03  | -0.1946 | -0.1945 | 0.5298  | 0.0181  | 0.1127  | 0.1656  | 0.1656   | -0.1549 | -1.0000 | 1.0000  |         |         |         |          |
| PL08_04  | 0.2062  | 0.4237  | -0.2280 | 0.8302  | -0.0000 | 0.0534  | 0.4497   | 0.1571  | 0.5123  | 0.2108  | 1.0000  |         |         |          |
| PL08_05  | 0.1487  | -0.0941 | 0.1343  | 0.1121  | 0.4421  | 0.2529  | -1.0000  | 0.3771  | 0.2877  | -0.3346 | 0.0843  | 1.0000  |         |          |
| PL08_06  | -1.0000 | -1.0000 | -0.0407 | -1.0000 | 0.1343  | 0.8231  | -1.0000  | -0.1184 | -1.0000 | -0.0801 | 0.1850  | 0.4482  | 1.0000  |          |
| PL08z_07 | 0.1072  | 0.2981  | -0.0499 | -1.0000 | -0.1864 | -1.0000 | 0.1770   | -0.1446 | -0.0000 | 0.1883  | -1.0000 | -0.3294 | 0.3010  | 1.0000   |

**1.3 German version (n = 36)**

**Head and torso:**

|         | PL04_01 | PL04_02 | PL04_03 | PL04_05 | PL04_06 |
|---------|---------|---------|---------|---------|---------|
| PL04_01 | 1.0000  |         |         |         |         |
| PL04_02 | 1.0000  | 1.0000  |         |         |         |
| PL04_03 | 0.3941  | 0.5548  | 1.0000  |         |         |
| PL04_05 | 1.0000  | 0.3394  | 0.1369  | 1.0000  |         |
| PL04_06 | 0.3010  | 1.0000  | 1.0000  | 0.0407  | 1.0000  |

**Upper extremity:**

|          | PL05z_01 | PL05z_02 | PL05z_03 | PL06z_01 | PL06z_02 | PL06z_03 |
|----------|----------|----------|----------|----------|----------|----------|
| PL05z_01 | 1.0000   |          |          |          |          |          |
| PL05z_02 | 0.5391   | 1.0000   |          |          |          |          |
| PL05z_03 | 0.4639   |          | 1.0000   |          |          |          |
| PL06z_01 | 0.5449   | 1.0000   | 0.4639   | 1.0000   |          |          |
| PL06z_02 | 0.3701   | 1.0000   | 0.3010   | 0.7617   | 1.0000   |          |
| PL06z_03 | 0.3927   | 0.4275   | 0.2981   | 0.6717   | 0.6575   | 1.0000   |

**Lower extremity:**

|          | PL07_01 | PL07_02 | PL07_03 | PL07_04 | PL07_05 | PL07_06 | PL07z_07 | PL08_01 | PL08_02 | PL08_03 | PL08_04 | PL08_05 | PL08_06 | PL08z_07 |
|----------|---------|---------|---------|---------|---------|---------|----------|---------|---------|---------|---------|---------|---------|----------|
| PL07_01  | 1.0000  |         |         |         |         |         |          |         |         |         |         |         |         |          |
| PL07_02  | 0.4275  | 1.0000  |         |         |         |         |          |         |         |         |         |         |         |          |
| PL07_03  | 0.5935  | -1.0000 | 1.0000  |         |         |         |          |         |         |         |         |         |         |          |
| PL07_04  | -1.0000 | -1.0000 | -1.0000 | 1.0000  |         |         |          |         |         |         |         |         |         |          |
| PL07_05  | 0.2164  | -1.0000 | 0.1248  | 1.0000  | 1.0000  |         |          |         |         |         |         |         |         |          |
| PL07_06  | 0.3927  | -1.0000 | 0.3733  | -1.0000 | 0.3927  | 1.0000  |          |         |         |         |         |         |         |          |
| PL07z_07 | 0.2350  | -1.0000 | 0.5786  | -1.0000 | 0.4764  | 0.4646  | 1.0000   |         |         |         |         |         |         |          |
| PL08_01  | 0.2350  | -1.0000 | 0.4049  | -1.0000 | -0.0403 | -0.2004 | 0.1415   | 1.0000  |         |         |         |         |         |          |
| PL08_02  | -1.0000 | -1.0000 | 0.1762  | -1.0000 | 0.4275  | 0.5391  | 1.0000   | 0.2520  | 1.0000  |         |         |         |         |          |
| PL08_03  | -0.1945 | -1.0000 | 0.5298  | 1.0000  | 0.3218  | 0.3293  | -0.0576  | -0.0576 | 0.1398  | 1.0000  |         |         |         |          |
| PL08_04  | -1.0000 | -1.0000 | 0.2086  | 1.0000  | 0.5071  | -1.0000 | 0.2986   | -0.0959 | 0.6068  | 0.1656  | 1.0000  |         |         |          |
| PL08_05  | 0.0167  | 0.2922  | -0.1369 | 1.0000  | 0.5313  | 0.2140  | -0.0132  | -0.0132 | 0.2922  | -0.1946 | 0.6631  | 1.0000  |         |          |
| PL08_06  | 0.0126  | -1.0000 | 0.3733  | -1.0000 | 0.6717  | 0.5449  | 0.4646   | -0.2004 | 0.5391  | 0.0181  | 0.6405  | 0.7565  | 1.0000  |          |
| PL08z_07 | -0.0403 | 0.2520  | -0.2088 | -1.0000 | -0.3563 | 0.1618  | 0.1415   | -0.3186 | 0.2520  | -0.6854 | 0.2986  | 0.4231  | 0.4646  | 1.0000   |

## 2 Accompanying symptoms

Polychoric correlation was performed for the following variables: tight/hard/tense (PL11\_01), restricted in mobility (PL11\_06), less resilient (PL11\_07).

### 2.1 Total sample (n = 72)

|         | PL11_01   | PL11_06   | PL11_07 |
|---------|-----------|-----------|---------|
| PL11_01 | 1         |           |         |
| PL11_06 | .31493096 | 1         |         |
| PL11_07 | .09858342 | .44153582 | 1       |

### 2.2 English version (n = 36)

|         | PL11_01   | PL11_06   | PL11_07 |
|---------|-----------|-----------|---------|
| PL11_01 | 1         |           |         |
| PL11_06 | .57263731 | 1         |         |
| PL11_07 | .44249671 | .53508439 | 1       |

### 2.3 German version (n = 36)

|         | PL11_01    | PL11_06   | PL11_07 |
|---------|------------|-----------|---------|
| PL11_01 | 1          |           |         |
| PL11_06 | .11625309  | 1         |         |
| PL11_07 | -.15864275 | .37172777 | 1       |

## 3 Sensory and affective pain quality

Polychoric correlation was performed for the following dimensions:

- **Sensory pain quality:** dull (SE02\_03), pressing (SE02\_04), cramping (SE02\_05), pulling (SE02\_06), tearing (SE02\_07), shooting (SE02\_08), stabbing (SE02\_09), sharp (SE02\_10)
- **Affective pain quality:** tiring/exhausting (SE02\_13), fearful (SE02\_14), wretched (SE02\_15), terrible (SE02\_18), paralyzing (SE02\_19), unbearable (SE02\_20)

### 3.1 Total sample (n = 72)

#### Sensory pain quality:

|         | SE02_03    | SE02_04    | SE02_05    | SE02_06   | SE02_07   | SE02_08   | SE02_09  | SE02_10 |
|---------|------------|------------|------------|-----------|-----------|-----------|----------|---------|
| SE02_03 | 1          |            |            |           |           |           |          |         |
| SE02_04 | .39721129  | 1          |            |           |           |           |          |         |
| SE02_05 | -.22833722 | .12819916  | 1          |           |           |           |          |         |
| SE02_06 | -.01191341 | .14896606  | .37959936  | 1         |           |           |          |         |
| SE02_07 | -.19535985 | .22368318  | .28663394  | .64744586 | 1         |           |          |         |
| SE02_08 | -.04383884 | .1481543   | .17852529  | .31302199 | .40456077 | 1         |          |         |
| SE02_09 | -.06288599 | .00822011  | .0113473   | .32397299 | .1184248  | .68599824 | 1        |         |
| SE02_10 | -.19556701 | -.06940389 | -.01821251 | .15260294 | .26056955 | .71789387 | .8149663 | 1       |

**Affective pain quality:**

|         | SE02_13   | SE02_14   | SE02_15   | SE02_18   | SE02_19  | SE02_20 |
|---------|-----------|-----------|-----------|-----------|----------|---------|
| SE02_13 | 1         |           |           |           |          |         |
| SE02_14 | .2263713  | 1         |           |           |          |         |
| SE02_15 | .16421014 | .54558711 | 1         |           |          |         |
| SE02_18 | .11529735 | .65233224 | .66834814 | 1         |          |         |
| SE02_19 | .370732   | .47291957 | .40477022 | .74974848 | 1        |         |
| SE02_20 | .29273063 | .40359218 | .3853943  | .75786081 | .7121409 | 1       |

**1.2 English version (n = 36)**

**Sensory pain quality:**

|         | SE02_03    | SE02_04   | SE02_05    | SE02_06   | SE02_07   | SE02_08   | SE02_09   | SE02_10 |
|---------|------------|-----------|------------|-----------|-----------|-----------|-----------|---------|
| SE02_03 | 1          |           |            |           |           |           |           |         |
| SE02_04 | .28644216  | 1         |            |           |           |           |           |         |
| SE02_05 | -.24692254 | .12267308 | 1          |           |           |           |           |         |
| SE02_06 | -.13676197 | .06420411 | .20112475  | 1         |           |           |           |         |
| SE02_07 | -.22852447 | .01151164 | .19153514  | .62604973 | 1         |           |           |         |
| SE02_08 | .17282721  | .47349418 | -.18716116 | .42898337 | .34009543 | 1         |           |         |
| SE02_09 | -.0375637  | .05315171 | -.22521828 | .5138558  | .09679106 | .69455314 | 1         |         |
| SE02_10 | -.01154903 | .17955821 | -.28748267 | .35167368 | .12973197 | .68987922 | .77354849 | 1       |

**Affective pain quality:**

|         | SE02_13    | SE02_14    | SE02_15   | SE02_18   | SE02_19   | SE02_20 |
|---------|------------|------------|-----------|-----------|-----------|---------|
| SE02_13 | 1          |            |           |           |           |         |
| SE02_14 | .25703401  | 1          |           |           |           |         |
| SE02_15 | -.1940914  | -.16390123 | 1         |           |           |         |
| SE02_18 | -.10590915 | .43631164  | .13244091 | 1         |           |         |
| SE02_19 | .52061817  | .3633298   | .03292463 | .7758881  | 1         |         |
| SE02_20 | .34407775  | .49381408  | .21086803 | .90197653 | .89443323 | 1       |



### 1.3 German version (n = 36)

#### Sensory pain quality:

|         | SE02_03    | SE02_04    | SE02_05   | SE02_06    | SE02_07   | SE02_08   | SE02_09   | SE02_10 |
|---------|------------|------------|-----------|------------|-----------|-----------|-----------|---------|
| SE02_03 | 1          |            |           |            |           |           |           |         |
| SE02_04 | .47517612  | 1          |           |            |           |           |           |         |
| SE02_05 | -.27492079 | .12168418  | 1         |            |           |           |           |         |
| SE02_06 | .10635224  | .24401997  | .52652628 | 1          |           |           |           |         |
| SE02_07 | -.14884421 | .42809328  | .39736932 | .72579895  | 1         |           |           |         |
| SE02_08 | -.29894327 | -.07565623 | .30206223 | .26741838  | .57129668 | 1         |           |         |
| SE02_09 | -.15168049 | -.06115616 | .17768293 | .12698942  | .19355004 | .71208073 | 1         |         |
| SE02_10 | -.37936981 | -.2369683  | .17272186 | -.01123323 | .37068109 | .831637   | .86829624 | 1       |

#### Affective pain quality:

|         | SE02_13   | SE02_14   | SE02_15   | SE02_18   | SE02_19   | SE02_20 |
|---------|-----------|-----------|-----------|-----------|-----------|---------|
| SE02_13 | 1         |           |           |           |           |         |
| SE02_14 | .22600524 | 1         |           |           |           |         |
| SE02_15 | .3667592  | .80109277 | 1         |           |           |         |
| SE02_18 | .24345326 | .79984513 | .89845917 | 1         |           |         |
| SE02_19 | .26760616 | .63798583 | .69862272 | .78790314 | 1         |         |
| SE02_20 | .25530664 | .41632854 | .53360598 | .65260039 | .51798794 | 1       |

## 4 Pain occurrence under mechanical stimuli

Polychoric correlation was performed for the following variables: when weight-bearing (ZV04\_01), during movement (ZV04\_02), at rest (ZV02\_03)

### 1.1 Total sample (n = 72)

|         | ZV04_01    | ZV04_02    | ZV04_03 |
|---------|------------|------------|---------|
| ZV04_01 | 1          |            |         |
| ZV04_02 | .22534002  | 1          |         |
| ZV04_03 | -.07913807 | -.21201348 | 1       |

## 1.2 English version (n = 36)

|         | ZV04_01    | ZV04_02    | ZV04_03 |
|---------|------------|------------|---------|
| ZV04_01 | 1          |            |         |
| ZV04_02 | .19186008  | 1          |         |
| ZV04_03 | -.06141853 | -.31101543 | 1       |

## 1.3 German version (n = 36)

|         | ZV04_01    | ZV04_02    | ZV04_03 |
|---------|------------|------------|---------|
| ZV04_01 | 1          |            |         |
| ZV04_02 | .38084932  | 1          |         |
| ZV04_03 | -.08245727 | -.08286131 | 1       |

## 5 Psychosocial motives for working with pain

Polychoric correlation was performed for the following variables:

- The pain's not so bad, so there's no need for a break. (SV03\_01)
- The pain is a natural consequence of dancing. (SV03\_02)
- I don't want to let my company down. (SV03\_03)
- I feel existential/ financial pressure. (SV03\_04)
- I feel pressure from superiors (training leader, choreographer). (SV03\_05)
- I feel pressure from colleagues. (SV03\_06)
- I don't want to be considered unreliable. (SV03\_07)
- I don't want to lose my role. (SV03\_08)
- I don't want to lose my status. (SV03\_09)
- I have concerns my dancing skills are going down. (SV03\_10)
- I have concerns my body is getting out of its aesthetic form. (SV03\_11)
- I want to impress the audience. (SV03\_12)
- Dancing is more important to me than my health. (SV03\_13)
- Dancing is my passion – I just have to keep dancing. (SV03\_14)

### 1.1 Total sample (n = 72)

|         | SV03_01    | SV03_02    | SV03_03   | SV03_04   | SV03_05   | SV03_06   | SV03_07   |
|---------|------------|------------|-----------|-----------|-----------|-----------|-----------|
| SV03_01 | 1          |            |           |           |           |           |           |
| SV03_02 | .13112168  | 1          |           |           |           |           |           |
| SV03_03 | .00310321  | .02310316  | 1         |           |           |           |           |
| SV03_04 | -.30826671 | -.04740609 | .43225761 | 1         |           |           |           |
| SV03_05 | -.15405249 | -.1942711  | .39479968 | .28694763 | 1         |           |           |
| SV03_06 | -.22016889 | -.03851218 | .33141141 | .61248138 | .68337936 | 1         |           |
| SV03_07 | -.20249914 | -.00394235 | .68810838 | .54379154 | .62553467 | .59297379 | 1         |
| SV03_08 | -.18334899 | -.03611152 | .61391724 | .43100055 | .45610832 | .41472189 | .84102546 |
| SV03_09 | -.23808368 | .13222995  | .52245623 | .64348634 | .26430089 | .61430805 | .71169758 |
| SV03_10 | -.10298589 | .05155111  | .21977938 | .57950127 | .16510934 | .54707232 | .51590046 |
| SV03_11 | -.10514254 | .11989243  | .40428552 | .60224817 | .3610688  | .63754526 | .62135444 |
| SV03_12 | -.1817817  | .09125127  | .3934237  | .48416535 | .23887322 | .38696451 | .53733432 |
| SV03_13 | -.21194019 | .26950167  | .02767623 | .45751447 | .12397055 | .43974823 | .3095098  |
| SV03_14 | -.13908963 | .26598537  | .04530236 | .34777886 | .04775272 | .11763157 | .34469205 |

|         | SV03_08   | SV03_09   | SV03_10   | SV03_11   | SV03_12   | SV03_13   | SV03_14 |
|---------|-----------|-----------|-----------|-----------|-----------|-----------|---------|
| SV03_08 | 1         |           |           |           |           |           |         |
| SV03_09 | .77007775 | 1         |           |           |           |           |         |
| SV03_10 | .54810185 | .72319564 | 1         |           |           |           |         |
| SV03_11 | .53856502 | .78024982 | .7147965  | 1         |           |           |         |
| SV03_12 | .61656887 | .81690247 | .64600315 | .72127575 | 1         |           |         |
| SV03_13 | .33101017 | .53259502 | .64993565 | .55588548 | .70862288 | 1         |         |
| SV03_14 | .3490483  | .49806553 | .68776847 | .36463819 | .52232506 | .71176575 | 1       |

### 1.2 English version (n = 36)

|         | SV03_01    | SV03_02    | SV03_03   | SV03_04   | SV03_05   | SV03_06   | SV03_07   |
|---------|------------|------------|-----------|-----------|-----------|-----------|-----------|
| SV03_01 | 1          |            |           |           |           |           |           |
| SV03_02 | .24844975  | 1          |           |           |           |           |           |
| SV03_03 | -.16698161 | .20051907  | 1         |           |           |           |           |
| SV03_04 | -.03580701 | -.07537903 | .66307471 | 1         |           |           |           |
| SV03_05 | -.39171336 | -.24997922 | .6149999  | .75207871 | 1         |           |           |
| SV03_06 | -.40147483 | -.26854052 | .6191515  | .8797994  | .80270811 | 1         |           |
| SV03_07 | -.33587097 | -.07660662 | .67318993 | .67879471 | .70202147 | .59885553 | 1         |
| SV03_08 | -.52499331 | -.03434543 | .55018912 | .56882634 | .5604853  | .62253231 | .9055383  |
| SV03_09 | -.26475914 | -.1917165  | .65039753 | .66368793 | .60934775 | .70831185 | .84807984 |
| SV03_10 | -.24866486 | -.10416417 | .33964099 | .56073622 | .26747853 | .60621665 | .74253774 |

|         |            |            |           |           |           |           |           |
|---------|------------|------------|-----------|-----------|-----------|-----------|-----------|
| SV03_11 | .06121312  | -.1146902  | .38929674 | .70035157 | .5587086  | .65222396 | .48285312 |
| SV03_12 | -.27439922 | -.45612597 | .37681066 | .69188583 | .47835021 | .62908109 | .68836115 |
| SV03_13 | -.29186847 | -.17193946 | .19861623 | .51472752 | .32237813 | .44570606 | .50945299 |
| SV03_14 | -.37938644 | .12810369  | .46468068 | .52552179 | .38281989 | .23595272 | .76911409 |

|         |           |           |           |           |           |           |         |
|---------|-----------|-----------|-----------|-----------|-----------|-----------|---------|
|         | SV03_08   | SV03_09   | SV03_10   | SV03_11   | SV03_12   | SV03_13   | SV03_14 |
| SV03_08 | 1         |           |           |           |           |           |         |
| SV03_09 | .88345658 | 1         |           |           |           |           |         |
| SV03_10 | .7715417  | .73234967 | 1         |           |           |           |         |
| SV03_11 | .47410473 | .68703644 | .6532235  | 1         |           |           |         |
| SV03_12 | .75180778 | .91594562 | .75463043 | .62800504 | 1         |           |         |
| SV03_13 | .68655134 | .6681693  | .77970642 | .62997268 | .70865776 | 1         |         |
| SV03_14 | .74291639 | .6570142  | .7185664  | .3776977  | .62300191 | .77573269 | 1       |

### 1.3 German version (n = 36)

|         |            |            |            |           |            |            |            |
|---------|------------|------------|------------|-----------|------------|------------|------------|
|         | SV03_01    | SV03_02    | SV03_03    | SV03_04   | SV03_05    | SV03_06    | SV03_07    |
| SV03_01 | 1          |            |            |           |            |            |            |
| SV03_02 | .03642206  | 1          |            |           |            |            |            |
| SV03_03 | .21102857  | -.11608962 | 1          |           |            |            |            |
| SV03_04 | -.35689223 | -.04822786 | .41329616  | 1         |            |            |            |
| SV03_05 | .02456155  | -.14500111 | .18389566  | .0906335  | 1          |            |            |
| SV03_06 | -.01459121 | .13580954  | .13605979  | .43237583 | .63126233  | 1          |            |
| SV03_07 | -.01759447 | .06755364  | .6975963   | .52680398 | .56502373  | .59489006  | 1          |
| SV03_08 | .2325762   | -.0221743  | .69273737  | .37413076 | .36884271  | .23967562  | .777116    |
| SV03_09 | -.08815855 | .37717948  | .49273638  | .50887481 | .05735145  | .54480776  | .63283467  |
| SV03_10 | .25194802  | .19723294  | .15325839  | .47879469 | .13755429  | .49416573  | .28606649  |
| SV03_11 | -.18067258 | .31454534  | .41239663  | .54361961 | .24079395  | .62678774  | .71833127  |
| SV03_12 | -.03254937 | .50542063  | .40956545  | .2986338  | .04659192  | .16755829  | .4085689   |
| SV03_13 | -.03235107 | .67917413  | -.11330045 | .34499344 | -.01440236 | .41634116  | .09246953  |
| SV03_14 | .19415941  | .43454698  | -.29239239 | .12168535 | -.28607058 | -.02046691 | -.13258639 |

|         |            |           |           |           |           |           |         |
|---------|------------|-----------|-----------|-----------|-----------|-----------|---------|
|         | SV03_08    | SV03_09   | SV03_10   | SV03_11   | SV03_12   | SV03_13   | SV03_14 |
| SV03_08 | 1          |           |           |           |           |           |         |
| SV03_09 | .73700831  | 1         |           |           |           |           |         |
| SV03_10 | .31685127  | .65409166 | 1         |           |           |           |         |
| SV03_11 | .59736718  | .85264633 | .76520749 | 1         |           |           |         |
| SV03_12 | .52027566  | .72779727 | .51208265 | .78182214 | 1         |           |         |
| SV03_13 | -.06025468 | .40545851 | .44733118 | .50767973 | .74795516 | 1         |         |
| SV03_14 | -.09969449 | .33295766 | .60443783 | .31022773 | .41873678 | .62264303 | 1       |
