# Supplementary material for: Development of a Multidimensional Pain Questionnaire in Professional Dance (MPQDA): a pilot study
Source: BMC Sports Sci Med Rehabil. 2022 Nov 3;14:189. doi: 10.1186/s13102-022-00580-5 (PMC9635190; doi:10.1186/s13102-022-00580-5)
Supplement: Supplementary file 4 — Additional file 4. Multidimensionaler Schmerzfragebogen im professionellen Tanz (MPQDA). [German version]. [file 13102_2022_580_MOESM4_ESM.pdf]

## Multidimensionaler Schmerzfragebogen im professionellen Tanz (MPQDA)

Dieser Fragebogen richtet sich an professionelle Tänzer\*innen mit Schmerzen innerhalb der letzten 3 Monate während der Arbeitszeit (in Training, Proben und/ oder Vorstellungen) oder innerhalb von 24 Stunden danach. Informationen zur Auswertung befinden sich am Ende (S.7).

### A. Soziodemographische und gesundheitsbezogene Angaben

1. Welches Geschlecht haben Sie?  
☐ weiblich  
☐ männlich  
☐ anders/divers
2. Wie alt sind Sie?  
\_\_\_\_\_ Jahre
3. Wie groß sind Sie?  
\_\_\_\_\_ Zentimeter (cm)
4. Wieviel wiegen Sie?  
\_\_\_\_\_ Kilogramm (kg)
5. Liegen bei Ihnen aktuell Verletzungen vor? (z.B. Muskelzerrung im Oberschenkel)  
☐ nein  
☐ ja, folgende: \_\_\_\_\_
6. Liegen bei Ihnen Erkrankungen vor? (z.B. hoher Blutdruck, Eisenmangel, Skoliose)  
☐ nein  
☐ ja, folgende: \_\_\_\_\_
7. Rauchen Sie?  
☐ nein  
☐ ja, bis zu 10 Zigaretten am Tag  
☐ ja, mehr als 10 Zigaretten am Tag

### B. Angaben zur Berufsausübung

8. Seit wie vielen Jahren sind Sie als Tänzer\*in berufstätig?  
(Anzahl der Jahre, in denen Sie Ihren Lebensunterhalt durch das Tanzen verdienen.)  
seit \_\_\_\_\_ Jahren
9. In welchem Beschäftigungsverhältnis stehen Sie zurzeit als Tänzer\*in?  
☐ freiberuflich  
☐ angestellt als  
☐ Gruppentänzer\*in (Corps de ballet)  
☐ Gruppentänzer\*in (Corps de ballet) mit Solovertrag  
☐ Solist\*in

10. Welche Tanzrichtung üben Sie überwiegend in der Woche aus?

- ☐ Klassischer Tanz (Ballett)/ Neoklassischer Tanz  
☐ Zeitgenössischer Tanz (Contemporary Dance)/ Tanztheater  
☐ Musical/ Revue  
☐ Sonstige: \_\_\_\_\_

11. Wie viele Stunden verbringen Sie durchschnittlich in der Woche mit Tanztraining, Proben und Vorstellungen?

Tanztraining: \_\_\_\_\_ Stunden pro Woche  
Proben: \_\_\_\_\_ Stunden pro Woche  
Vorstellungen: \_\_\_\_\_ Stunden pro Woche

### C. Schmerzfragen

12. Hatten Sie innerhalb der letzten 3 Monate Schmerzen während bzw. innerhalb von 24 Stunden nach der Arbeitszeit (Training/ Proben/ Vorstellungen)?

- ☐ nein  
☐ ja

*Alle folgenden Fragen beziehen sich auf die **Schmerzen innerhalb der letzten 3 Monate**. Beantworten Sie die nachfolgenden Fragen, wenn Sie in der vorangegangenen Frage „ja“ angegeben haben.*

13. Bitte geben Sie die schmerzhafteste/n Stelle/n der letzten 3 Monate an, die während bzw. innerhalb von 24 Stunden nach der Arbeitszeit (Training/ Proben/Vorstellungen) aufgetreten sind. (Mehrfachantworten sind möglich)

#### **Kopf und Rumpf**

|                                        |                          |
|----------------------------------------|--------------------------|
| Kopf                                   | <input type="checkbox"/> |
| Nacken/ Halswirbelsäule                | <input type="checkbox"/> |
| Oberer Rücken/ Brustwirbelsäule        | <input type="checkbox"/> |
| Unterer Rücken/ Lendenwirbelsäule/ ISG | <input type="checkbox"/> |
| Bauch                                  | <input type="checkbox"/> |

#### **Obere Extremität**

|                      | <b>rechts</b>            | <b>links</b>             |
|----------------------|--------------------------|--------------------------|
| Schulter/ Oberarm    | <input type="checkbox"/> | <input type="checkbox"/> |
| Ellenbogen/ Unterarm | <input type="checkbox"/> | <input type="checkbox"/> |
| Handgelenk/ Hand     | <input type="checkbox"/> | <input type="checkbox"/> |

#### **Untere Extremität**

|                  | <b>rechts</b>            | <b>links</b>             |
|------------------|--------------------------|--------------------------|
| Hüftgelenk       | <input type="checkbox"/> | <input type="checkbox"/> |
| Oberschenkel     | <input type="checkbox"/> | <input type="checkbox"/> |
| Kniegelenk       | <input type="checkbox"/> | <input type="checkbox"/> |
| Unterschenkel    | <input type="checkbox"/> | <input type="checkbox"/> |
| Sprunggelenk     | <input type="checkbox"/> | <input type="checkbox"/> |
| Rück-/ Mittelfuß | <input type="checkbox"/> | <input type="checkbox"/> |
| Vorfuß           | <input type="checkbox"/> | <input type="checkbox"/> |

14. Bitte geben Sie die am stärksten betroffene Schmerzstelle der letzten 3 Monate an, die während bzw. innerhalb von 24 Stunden nach der Arbeitszeit (Training/ Proben/Vorstellungen) aufgetreten ist.

Bitte geben Sie die Stelle so genau wie möglich an. Ist der Schmerz mehr generalisiert, kann auch eine Oberkategorienausgewählt werden (z.B. obere Extremität). Wenn Sie in der vorangegangenen Frage nur eine Stelle angegeben haben, geben Sie diese erneut an.)

|                                        |                          |
|----------------------------------------|--------------------------|
| <b>Kopf und Rumpf</b>                  | <input type="checkbox"/> |
| Kopf                                   | <input type="checkbox"/> |
| Nacken/ Halswirbelsäule                | <input type="checkbox"/> |
| Oberer Rücken/ Brustwirbelsäule        | <input type="checkbox"/> |
| Unterer Rücken/ Lendenwirbelsäule/ ISG | <input type="checkbox"/> |
| Bauch                                  | <input type="checkbox"/> |

|                         |                          |                          |
|-------------------------|--------------------------|--------------------------|
| <b>Obere Extremität</b> | <input type="checkbox"/> |                          |
|                         | <b>rechts</b>            | <b>links</b>             |
| Schulter/ Oberarm       | <input type="checkbox"/> | <input type="checkbox"/> |
| Ellenbogen/ Unterarm    | <input type="checkbox"/> | <input type="checkbox"/> |
| Handgelenk/ Hand        | <input type="checkbox"/> | <input type="checkbox"/> |

|                          |                          |                          |
|--------------------------|--------------------------|--------------------------|
| <b>Untere Extremität</b> | <input type="checkbox"/> |                          |
|                          | <b>rechts</b>            | <b>links</b>             |
| Hüftgelenk               | <input type="checkbox"/> | <input type="checkbox"/> |
| Oberschenkel             | <input type="checkbox"/> | <input type="checkbox"/> |
| Kniegelenk               | <input type="checkbox"/> | <input type="checkbox"/> |
| Unterschenkel            | <input type="checkbox"/> | <input type="checkbox"/> |
| Sprunggelenk             | <input type="checkbox"/> | <input type="checkbox"/> |
| Rück-/ Mittelfuß         | <input type="checkbox"/> | <input type="checkbox"/> |
| Vorfuß                   | <input type="checkbox"/> | <input type="checkbox"/> |

*Alle folgenden Fragen beziehen sich auf die **am stärksten betroffene Schmerzstelle** aus der vorangegangenen Frage.*

15. Die Schmerzstelle ist...

|                                    |                          |                          |                          |                          |
|------------------------------------|--------------------------|--------------------------|--------------------------|--------------------------|
|                                    | <b>nicht</b>             | <b>etwas</b>             | <b>ziemlich</b>          | <b>sehr</b>              |
| fest/ hart/ verspannt/ angespannt  | <input type="checkbox"/> | <input type="checkbox"/> | <input type="checkbox"/> | <input type="checkbox"/> |
| in der Beweglichkeit eingeschränkt | <input type="checkbox"/> | <input type="checkbox"/> | <input type="checkbox"/> | <input type="checkbox"/> |
| in der Belastbarkeit eingeschränkt | <input type="checkbox"/> | <input type="checkbox"/> | <input type="checkbox"/> | <input type="checkbox"/> |

16. Bitte geben Sie Ihre durchschnittlich empfundene Schmerzintensität innerhalb der letzten 3 Monate zwischen kein Schmerz (= 0) und schlimmster denkbarer Schmerz (= 10) an.

kein Schmerz

schlimmster  
denkbarer Schmerz

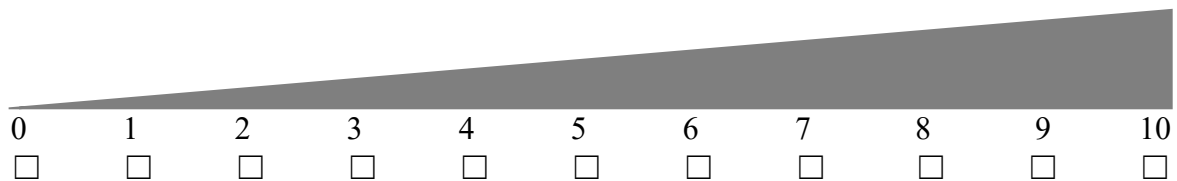

17. Ich empfinde die Schmerzen als...

|                          | Trifft<br>nicht zu       | Trifft ein<br>wenig zu   | Trifft<br>weitgehend zu  | Trifft<br>genau zu       |
|--------------------------|--------------------------|--------------------------|--------------------------|--------------------------|
| ziehend                  | <input type="checkbox"/> | <input type="checkbox"/> | <input type="checkbox"/> | <input type="checkbox"/> |
| reißend                  | <input type="checkbox"/> | <input type="checkbox"/> | <input type="checkbox"/> | <input type="checkbox"/> |
| einschießend/ blitzartig | <input type="checkbox"/> | <input type="checkbox"/> | <input type="checkbox"/> | <input type="checkbox"/> |
| stechend                 | <input type="checkbox"/> | <input type="checkbox"/> | <input type="checkbox"/> | <input type="checkbox"/> |
| scharf                   | <input type="checkbox"/> | <input type="checkbox"/> | <input type="checkbox"/> | <input type="checkbox"/> |
| beängstigend/ bedrohlich | <input type="checkbox"/> | <input type="checkbox"/> | <input type="checkbox"/> | <input type="checkbox"/> |
| elend                    | <input type="checkbox"/> | <input type="checkbox"/> | <input type="checkbox"/> | <input type="checkbox"/> |
| furchtbar                | <input type="checkbox"/> | <input type="checkbox"/> | <input type="checkbox"/> | <input type="checkbox"/> |
| lähmend                  | <input type="checkbox"/> | <input type="checkbox"/> | <input type="checkbox"/> | <input type="checkbox"/> |
| unerträglich             | <input type="checkbox"/> | <input type="checkbox"/> | <input type="checkbox"/> | <input type="checkbox"/> |

18. Bitte geben Sie an, seit wann die Schmerzen auftreten und anschließend wie häufig diese im gewählten Zeitraum auftreten (selten bis immer).

☐ **maximal eine Woche**

☐ selten ☐ häufig ☐ immer

☐ **zwischen einer Woche und 6 Wochen**

☐ selten ☐ häufig ☐ immer

☐ **zwischen 6 und 12 Wochen**

☐ selten ☐ häufig ☐ immer

☐ **zwischen 3 und 6 Monaten**

☐ selten ☐ häufig ☐ immer

☐ **länger als 6 Monate**

☐ selten ☐ häufig ☐ immer

19. Das Auftreten der Schmerzen erfolgte...

- ☐ plötzlich/ durch ein einzelnes (traumatisches) Ereignis
- ☐ über die Zeit/ schleichend
- ☐ innerhalb von 24 Stunden nach der Arbeitszeit (Training/Proben/Vorstellungen)
- ☐ anders, folgendermaßen: \_\_\_\_\_

20. Die Schmerzen treten auf bei...

|                                       | <b>nie</b>               | <b>selten</b>            | <b>häufig</b>            | <b>immer</b>             |
|---------------------------------------|--------------------------|--------------------------|--------------------------|--------------------------|
| Belastung<br>(z.B. mit Körpergewicht) | <input type="checkbox"/> | <input type="checkbox"/> | <input type="checkbox"/> | <input type="checkbox"/> |
| Bewegung                              | <input type="checkbox"/> | <input type="checkbox"/> | <input type="checkbox"/> | <input type="checkbox"/> |
| In Ruhe                               | <input type="checkbox"/> | <input type="checkbox"/> | <input type="checkbox"/> | <input type="checkbox"/> |

21. Bitte geben Sie an, inwiefern Sie die Schmerzen innerhalb der letzten 3 Monate als gut/positiv (eher unbedenklich, nicht störend) oder schlecht/negativ (bedenklich, störend) empfinden.

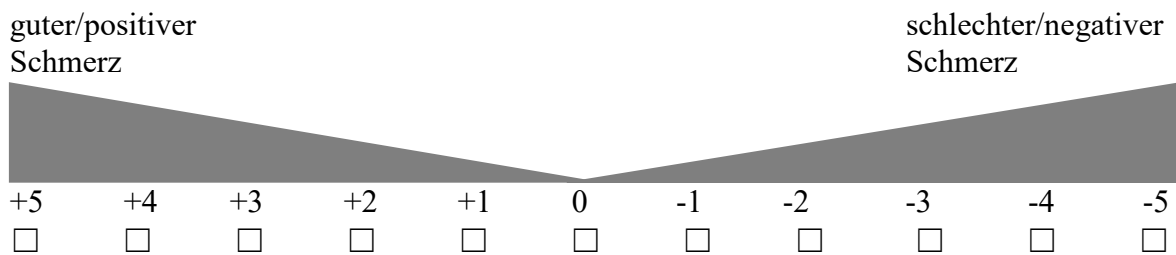

22. Arbeiten Sie trotz der Schmerzen (in Training/Proben/Vorstellungen)?

|                  | <b>Nein</b>              | <b>Ja, mit Einschränkungen</b> | <b>Ja, ohne Einschränkungen</b> |
|------------------|--------------------------|--------------------------------|---------------------------------|
| im Training      | <input type="checkbox"/> | <input type="checkbox"/>       | <input type="checkbox"/>        |
| in Proben        | <input type="checkbox"/> | <input type="checkbox"/>       | <input type="checkbox"/>        |
| in Vorstellungen | <input type="checkbox"/> | <input type="checkbox"/>       | <input type="checkbox"/>        |

*Wenn Sie trotz der Schmerzen arbeiten, d.h. wenn Sie in der vorangegangenen Frage mindestens eine Kategorie mit „ja“ angegeben haben, beantworten Sie auch die nachfolgende Frage.*

### 23. Warum arbeiten Sie trotz Schmerzen?

|                                                                                 | <b>Trifft<br/>nicht zu</b> | <b>Trifft ein<br/>wenig zu</b> | <b>Trifft<br/>weitgehend zu</b> | <b>Trifft<br/>genau zu</b> |
|---------------------------------------------------------------------------------|----------------------------|--------------------------------|---------------------------------|----------------------------|
| Ich will meine Company<br>nicht im Stich lassen.                                | <input type="checkbox"/>   | <input type="checkbox"/>       | <input type="checkbox"/>        | <input type="checkbox"/>   |
| Ich empfinde existenziellen/<br>finanziellen Druck.                             | <input type="checkbox"/>   | <input type="checkbox"/>       | <input type="checkbox"/>        | <input type="checkbox"/>   |
| Ich empfinde Druck durch<br>Vorgesetzte (Trainingsleiter*in,<br>Choreograph*in) | <input type="checkbox"/>   | <input type="checkbox"/>       | <input type="checkbox"/>        | <input type="checkbox"/>   |
| Ich empfinde Druck durch<br>Kolleg*innen.                                       | <input type="checkbox"/>   | <input type="checkbox"/>       | <input type="checkbox"/>        | <input type="checkbox"/>   |
| Ich möchte nicht als<br>unzuverlässig gelten.                                   | <input type="checkbox"/>   | <input type="checkbox"/>       | <input type="checkbox"/>        | <input type="checkbox"/>   |
| Ich will meine Rolle<br>nicht verlieren.                                        | <input type="checkbox"/>   | <input type="checkbox"/>       | <input type="checkbox"/>        | <input type="checkbox"/>   |
| Ich will meinen Status<br>nicht verlieren.                                      | <input type="checkbox"/>   | <input type="checkbox"/>       | <input type="checkbox"/>        | <input type="checkbox"/>   |
| Ich habe Bedenken, dass<br>meine tänzerischen<br>Leistungen nachlassen.         | <input type="checkbox"/>   | <input type="checkbox"/>       | <input type="checkbox"/>        | <input type="checkbox"/>   |
| Ich habe Bedenken, dass<br>mein Körper aus der<br>ästhetischen Form gerät.      | <input type="checkbox"/>   | <input type="checkbox"/>       | <input type="checkbox"/>        | <input type="checkbox"/>   |
| Ich will das Publikum<br>beeindrucken.                                          | <input type="checkbox"/>   | <input type="checkbox"/>       | <input type="checkbox"/>        | <input type="checkbox"/>   |
| Tanzen ist mir wichtiger<br>als meine Gesundheit.                               | <input type="checkbox"/>   | <input type="checkbox"/>       | <input type="checkbox"/>        | <input type="checkbox"/>   |
| Tanzen ist meine<br>große Leidenschaft<br>– ich muss einfach weiter tanzen.     | <input type="checkbox"/>   | <input type="checkbox"/>       | <input type="checkbox"/>        | <input type="checkbox"/>   |

Andere/ weitere Gründe, folgende:

---



---

## Auswertung der Schmerzfragen (Block C)

| Frage                                                                    | Punkte                                                                                                                                                                            | Bildung eines Summenscore*                   |
|--------------------------------------------------------------------------|-----------------------------------------------------------------------------------------------------------------------------------------------------------------------------------|----------------------------------------------|
| F 12 <sup>†</sup>                                                        | entfällt                                                                                                                                                                          | entfällt                                     |
| F 13: Kopf und Rumpf                                                     | pro ausgewählte Region = 1 Punkt                                                                                                                                                  | Ja (minimale Summe = 0, maximale Summe = 5)  |
| F 13: Obere Extremität                                                   | pro ausgewählte Region = 1 Punkt                                                                                                                                                  | Ja (minimale Summe = 0, maximale Summe = 6)  |
| F 13: Untere Extremität                                                  | pro ausgewählte Region = 1 Punkt                                                                                                                                                  | Ja (minimale Summe = 0, maximale Summe = 14) |
| F 14 <sup>‡</sup>                                                        | entfällt                                                                                                                                                                          | entfällt                                     |
| F 15                                                                     | nicht = 0 Punkte<br>etwas = 1 Punkt<br>ziemlich = 2 Punkte<br>sehr = 3 Punkte                                                                                                     | Nein, Einzelwertung pro Item                 |
| F 16                                                                     | entspricht dem angekreuzten Punktwert auf der Skala (0 bis 10)                                                                                                                    | Nein, Einzelwertung                          |
| F 17: Sensorische Qualität („ziehend“ bis „scharf“)                      | trifft nicht zu = 0 Punkte<br>trifft ein wenig zu = 1 Punkt<br>trifft weitgehend zu = 2 Punkte<br>trifft genau zu = 3 Punkte                                                      | Ja (minimale Summe = 0, maximale Summe = 15) |
| F 17: Affektive Qualität („beängstigend/ bedrohlich“ bis „unerträglich“) | trifft nicht zu = 0 Punkte<br>trifft ein wenig zu = 1 Punkt<br>trifft weitgehend zu = 2 Punkte<br>trifft genau zu = 3 Punkte                                                      | Ja (minimale Summe = 0, maximale Summe = 15) |
| F 18: Dauer                                                              | maximal 1 Woche = 0 Punkte<br>1 Woche bis 6 Wochen = 1 Punkt<br>6 bis 12 Wochen = 2 Punkte<br>3 bis 6 Monaten = 3 Punkte<br>länger als 6 Monate = 4 Punkte                        | Nein, Einzelwertung                          |
| F 18: Frequenz                                                           | selten = 1 Punkt<br>häufig = 2 Punkte<br>immer = 3 Punkte                                                                                                                         | Nein, Einzelwertung                          |
| F 19 <sup>‡</sup>                                                        | entfällt                                                                                                                                                                          | entfällt                                     |
| F 20                                                                     | nie = 0 Punkte<br>selten = 1 Punkt<br>häufig = 2 Punkte<br>immer = 3 Punkte                                                                                                       | Nein, Einzelwertung pro Item                 |
| F 21                                                                     | +5 = 0 Punkte, +4 = 1 Punkt,<br>+3 = 2 Punkte, +2 = 3 Punkte,<br>+1 = 4 Punkte, 0 = 5 Punkte,<br>-1 = 6 Punkte, -2 = 7 Punkte,<br>-3 = 8 Punkte, -4 = 9 Punkte,<br>-5 = 10 Punkte | Nein, Einzelwertung                          |
| F 22                                                                     | Nein = 2 Punkte<br>Ja, mit Einschränkungen = 1 Punkt<br>Ja, ohne Einschränkungen = 0 Punkte                                                                                       | Nein, Einzelwertung pro Item                 |
| F 23                                                                     | trifft nicht zu = 0 Punkte<br>trifft ein wenig zu = 1 Punkt<br>trifft weitgehend zu = 2 Punkte<br>trifft genau zu = 3 Punkte                                                      | Ja (minimale Summe = 0, maximale Summe = 36) |

<sup>†</sup>Dieser Schmerzfragebogen richtet sich an Tänzer\*innen, die auf Frage 12 mit „ja“ antworten. Die folgenden Fragen sind für Schmerzen der letzten 3 Monate validiert.

<sup>‡</sup>Die Fragen sind inhaltlich wichtig, können aber nicht numerisch gewertet werden, da es sich bei den Antwortmöglichkeiten um gleichrangige Kategorien handelt.

\*Die Punktwerte der einzelnen Items können summiert werden.
